# Supplementary material
Source: PubMed Central journal article supplement (PMC7061307)
Supplement: NIHMS1545887-supplement-2.pdf [file NIHMS1545887-supplement-2.pdf]

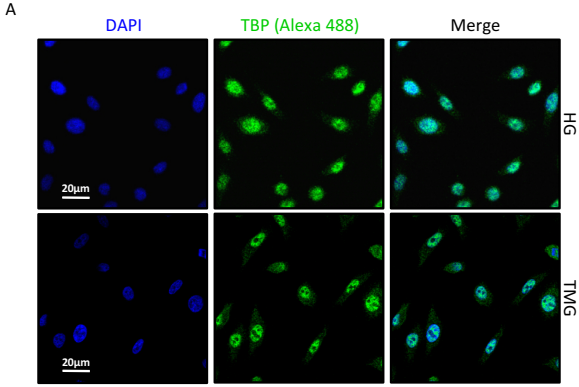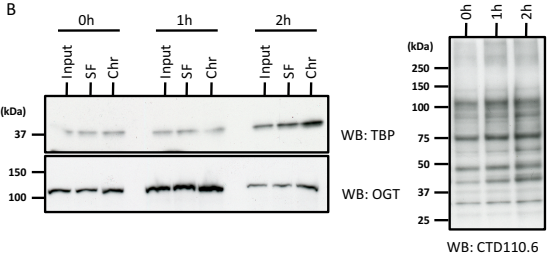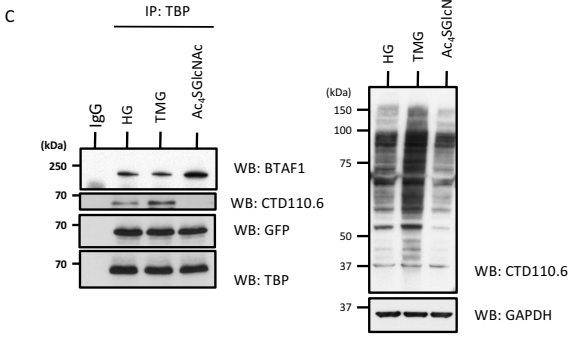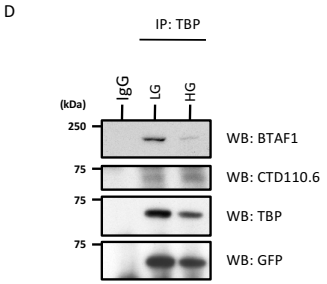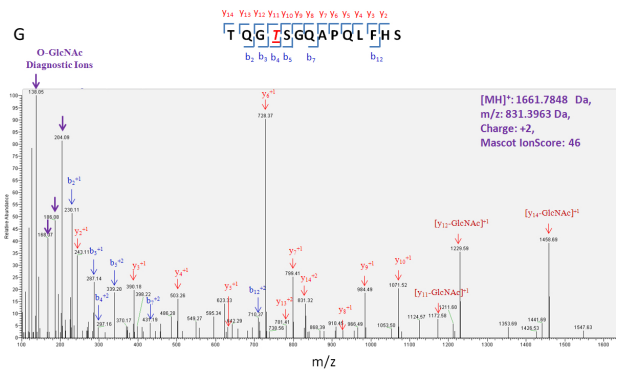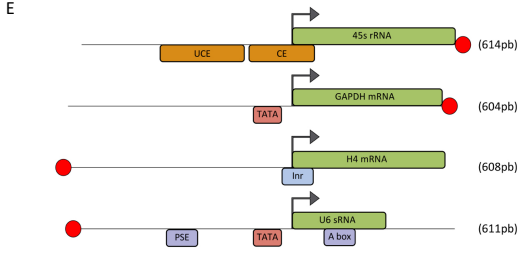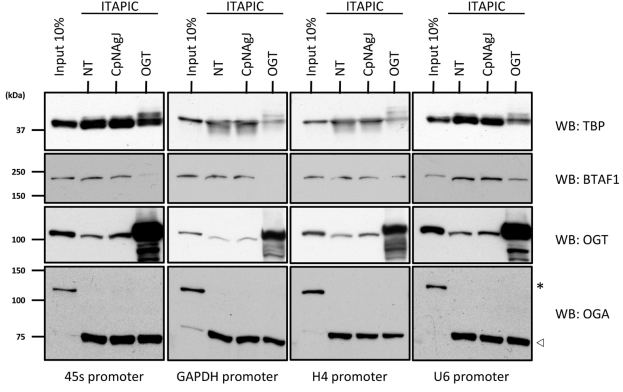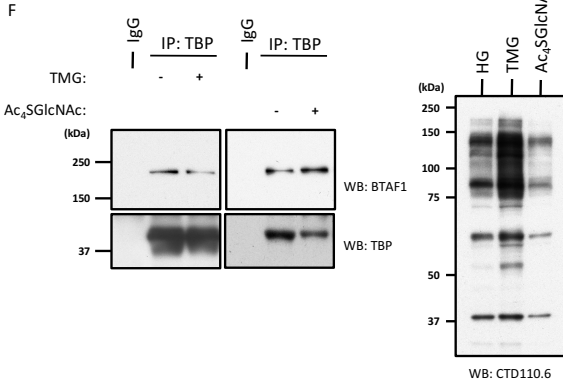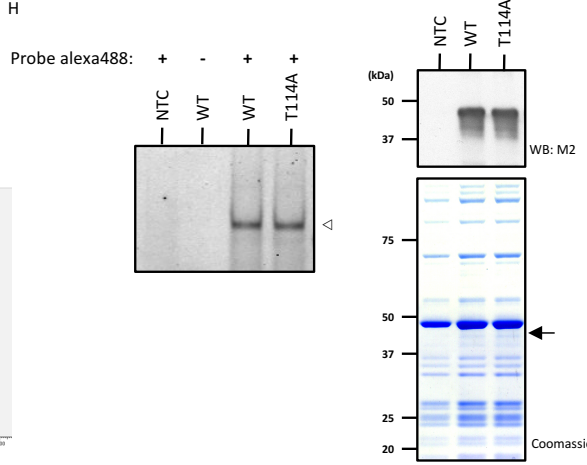

**Figure S1: related to Figure 1**

(A) Effect of TMG treatment on TBP cellular localization in HeLa cells. (B) TMG treatment increased TBP interaction with chromatin. Cells were incubated for the indicated time with TMG. Input, DNA-bound protein fraction (Chr) and soluble protein fraction (SF) were immunoblotted with indicated antibodies (left panel). TMG effect on total protein O-GlcNAcylation was normalized to total cell lysate (right panel). (C) Effect of TMG and Ac<sub>4</sub>SGlcNAc on GFP-TBP O-GlcNAcylation and BTAF1 interaction (left panel). Effect of each inhibitors on global O-GlcNAcylation by Western blot (right panel). (D) O-GlcNAcylation of GFP-TBP and its ability to interact with BTAF1 under different glucose conditions. (E) *In vitro* immobilized template analysis of PIC assembly (ITAPIC). Schematic representation of the organization of the selected promoters with the position of the biotin (red bullet) used for *in vitro* PIC assembly (upper panel). Immunoblots of TBP, BTAF1, OGT and OGA enrichment in ITAPIC on the indicated promoter (lower panel). \* and ◁ point expected molecular weight corresponding to OGA full length and a shorter OGA isoform respectively. (F) TMG or Ac<sub>4</sub>SGlcNAc treatment of HeLa cells decreased or increased co-precipitation of BTAF1 with TBP, respectively. BTAF1 was co-immunoprecipitated with TBP (left panel). Effect of TMG and Ac<sub>4</sub>SGlcNAc on protein O-GlcNAcylation (right panel). (G) CID/HCD spectrum of a peptide covering the T114-O-GlcNAc. (H) EMSA of TBP wild-type and O-GlcNAc T114A mutant (left panel, ◁ indicates TBP:DNA complex). Production by coupled *in vitro* transcription/translation of 3X-FLAG tagged TBP wild-type and its mutant version (right panels). M2 3XFLAG immunoblot and Coomassie staining (Arrow indicates band corresponding to TBP).



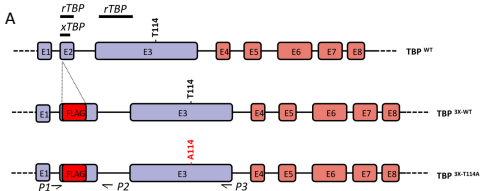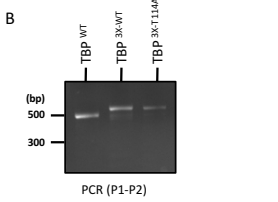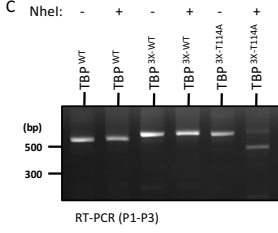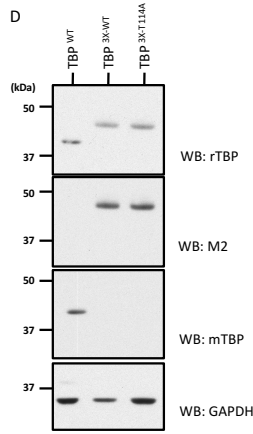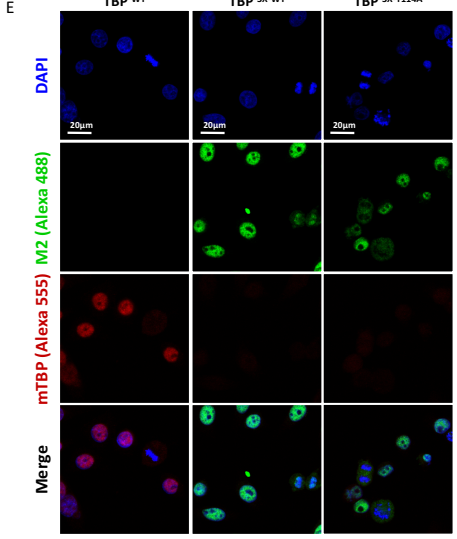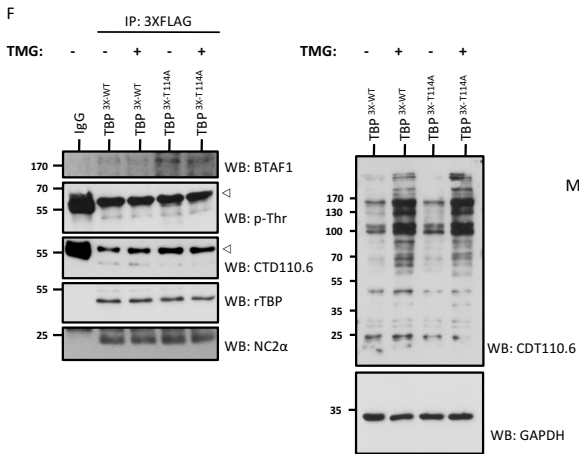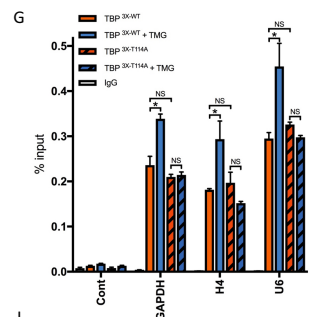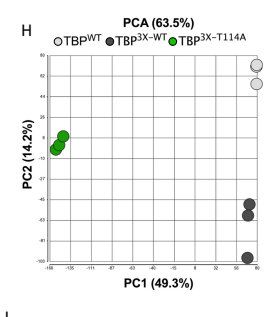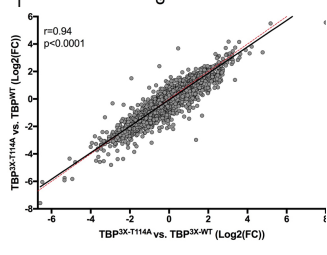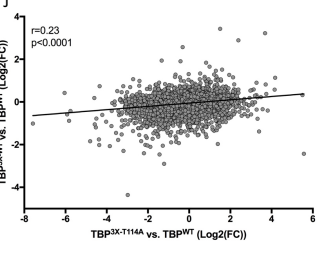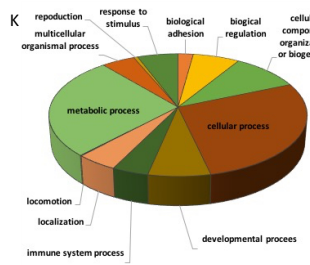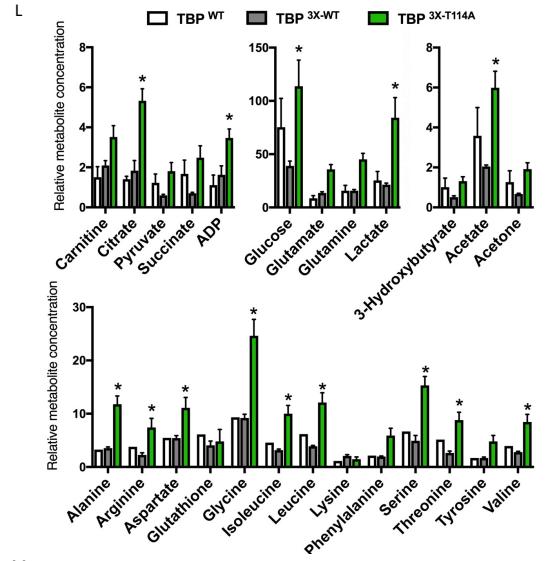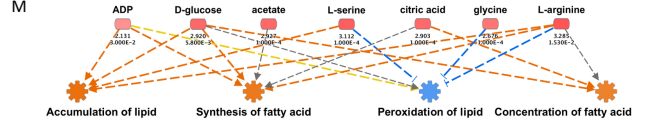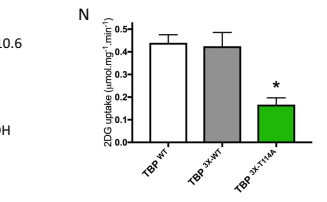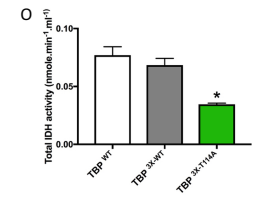

## Figure S2: Related to Figure 2

(A) Schematic representation of the *TBP* gene edition. First 3X-FLAG tag has been inserted in frame in the exon 2 after the endogenous start codon of TBP in order to disrupt a well characterized anti-TBP antibody to track wild-type TBP and its edited counterpart. Then exon 3 that encodes the area containing the T114 mapped O-GlcNAc site of TBP has been targeted and the codons of the T114 and the T115 were respectively engineered to code for an alanine and for threonine with a silent mutation generating a *NheI* restriction site for screening purposes. (B) Genomic PCR of the area spanning exon 2 of *TBP*. (C) RT-PCR validation of the insertion of the 3XFLAG tag and the edition of the codons T114 and T115. (D) Expression level of endogenous TBP and its edited versions. Cell lysates were immunoblotted with indicated antibodies. (E) Cellular localization of TBP<sup>WT</sup>, TBP<sup>3X-WT</sup> and TBP<sup>3X-T114A</sup>. Immunostaining was performed with the indicated antibodies and dyes. (F) O-GlcNAcylation and threonine phosphorylation levels of HeLa CRISPR edited TBP<sup>3X-WT</sup> and TBP<sup>3X-T114A</sup> and their ability to interact with BTAF1 and NC2 $\alpha$  under 25 mM glucose treated or not with TMG (left panels);  $\triangleleft$  indicates IgG. Effect of TMG on global O-GlcNAcylation level (right panel). (G) CRISPR edited TBP<sup>3X-WT</sup> and TBP<sup>3X-T114A</sup> promoter occupancy on *GAPDH*, *H4* and *U6* promoter treated or not with TMG. Data are mean  $\pm$  SEM,  $n \geq 2$ , \* $p < 0.05$ , NS: not significant. (H) Principal component analysis of the RNA-Seq data of TBP<sup>WT</sup>, TBP<sup>3X-WT</sup> and TBP<sup>3X-T114A</sup> cells ( $n = 3$ ). (I) Scatterplot comparing Log<sub>2</sub>(FC) of gene expression profiling of TBP<sup>3X-T114A</sup> to both wild-type cells. Solid black line shows linear correlation and red dash line represent perfect correlation. (J) Scatterplot comparing Log<sub>2</sub>(FC) of gene expression profiling of TBP<sup>3X-T114A</sup> and TBP<sup>3X-WT</sup> to TBP<sup>WT</sup> cell line. Solid black line shows linear correlation. (K) GO analysis of differentially express transcripts between TBP<sup>3X-T114A</sup> and TBP<sup>3X-WT</sup> cells. (L) Metabolomics analysis of the TBP<sup>WT</sup>, TBP<sup>3X-WT</sup> and TBP<sup>3X-T114A</sup> cells by <sup>1</sup>H-NMR normalized to total protein. Data are mean  $\pm$  SEM,  $n = 3$ , \* $p < 0.05$

compared to both wild-type cells. (M) IPA representation showing the upregulation prediction function pathways of accumulation of lipids, synthesis of fatty acids, concentration of fatty acids, and downregulation of peroxidation of lipids. (N) 2-deoxyglucose (2DG) uptake in  $TBP^{WT}$ ,  $TBP^{3X-WT}$  and  $TBP^{3X-T114A}$  cells. Data are mean  $\pm$  SEM, n = 4, \*p <0.05 compared to both wild-type cells. (O) Total IDH activity in  $TBP^{3X-T114A}$  and  $TBP^{3X-WT}$  to  $TBP^{WT}$  cells. Data are mean  $\pm$  SD, n = 3, \*p <0.05 compared to both  $TBP^{WT}$  and  $TBP^{3X-WT}$ .

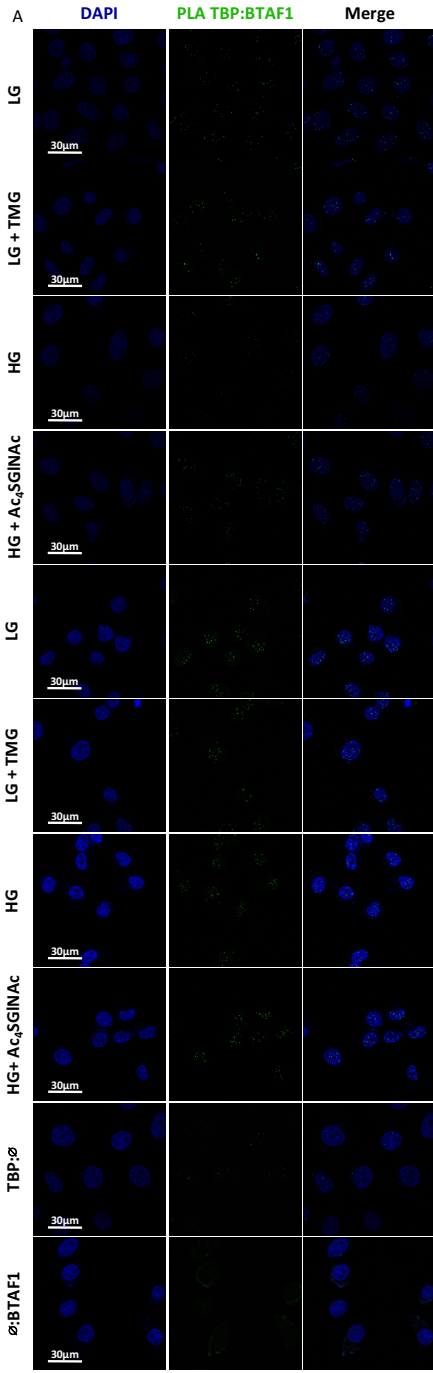

TBP 3X-WT  
 WTLL:3X-T114A

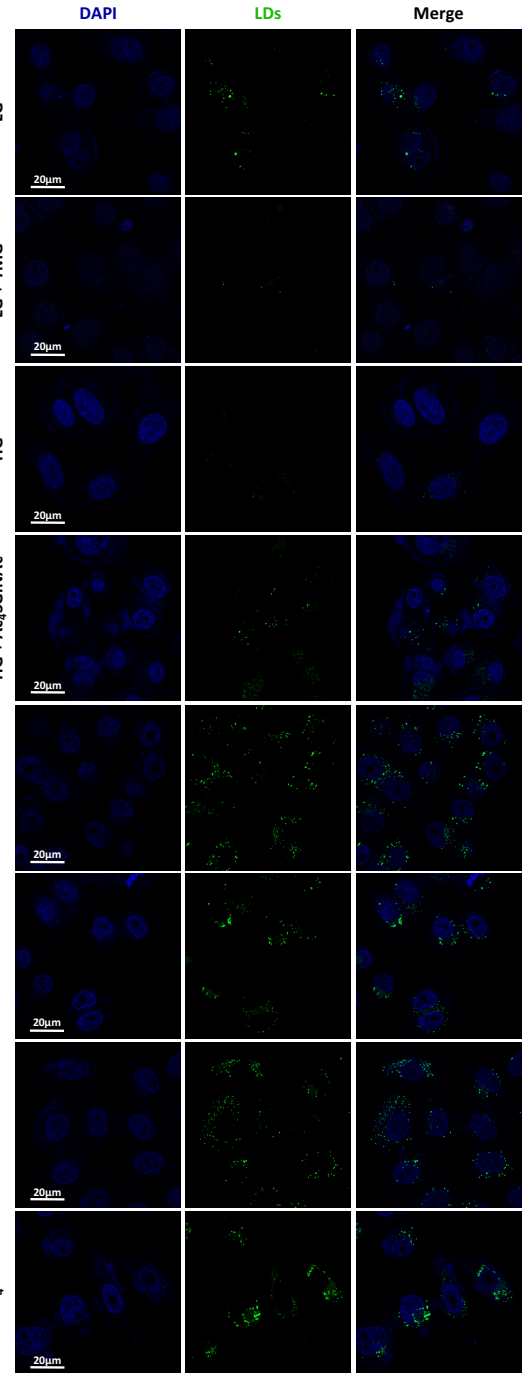

TBP 3X-WT  
 TBP 3X-T114A

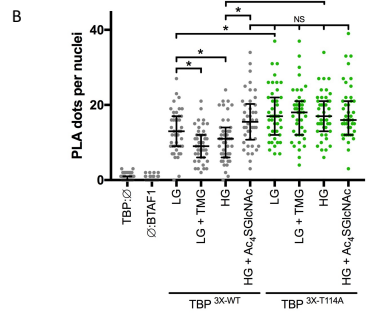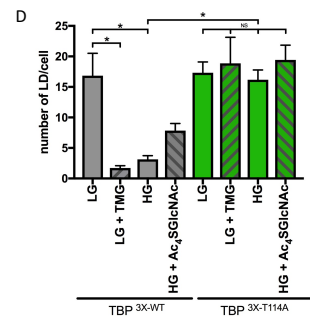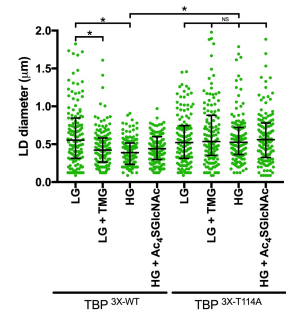

### Figure S3: Related to Figure 3

(A) *In situ* interaction of TBP:BTAF stained with proximity ligation assay (PLA) in TBP<sup>3X-WT</sup> and TBP<sup>3X-T114A</sup> cells under 5.5- or 25mM glucose treated or not with TMG or Ac,SGlcNAc. (B) Quantification of PLA signal. Number of PLA dots per nuclei are shown as median with interquartile range (n = 3, total of 43 cells per condition were measured), \*p < 0.05, NS: not significant. (C) LDs staining of indicated cells under 5.5- or 25 mM glucose treated or not with TMG or Ac,SGlcNAc. (D) Quantitative analysis of the LD number per cell (left panel) and size (right panel) of Figure S3K. Number of LD per cell are shown as mean ± SEM (n ≥ 3), NS: not significant. LDs size data are median with interquartile range (n ≥ 3, total of 134 LDs were measured per condition), \*p < 0.05.

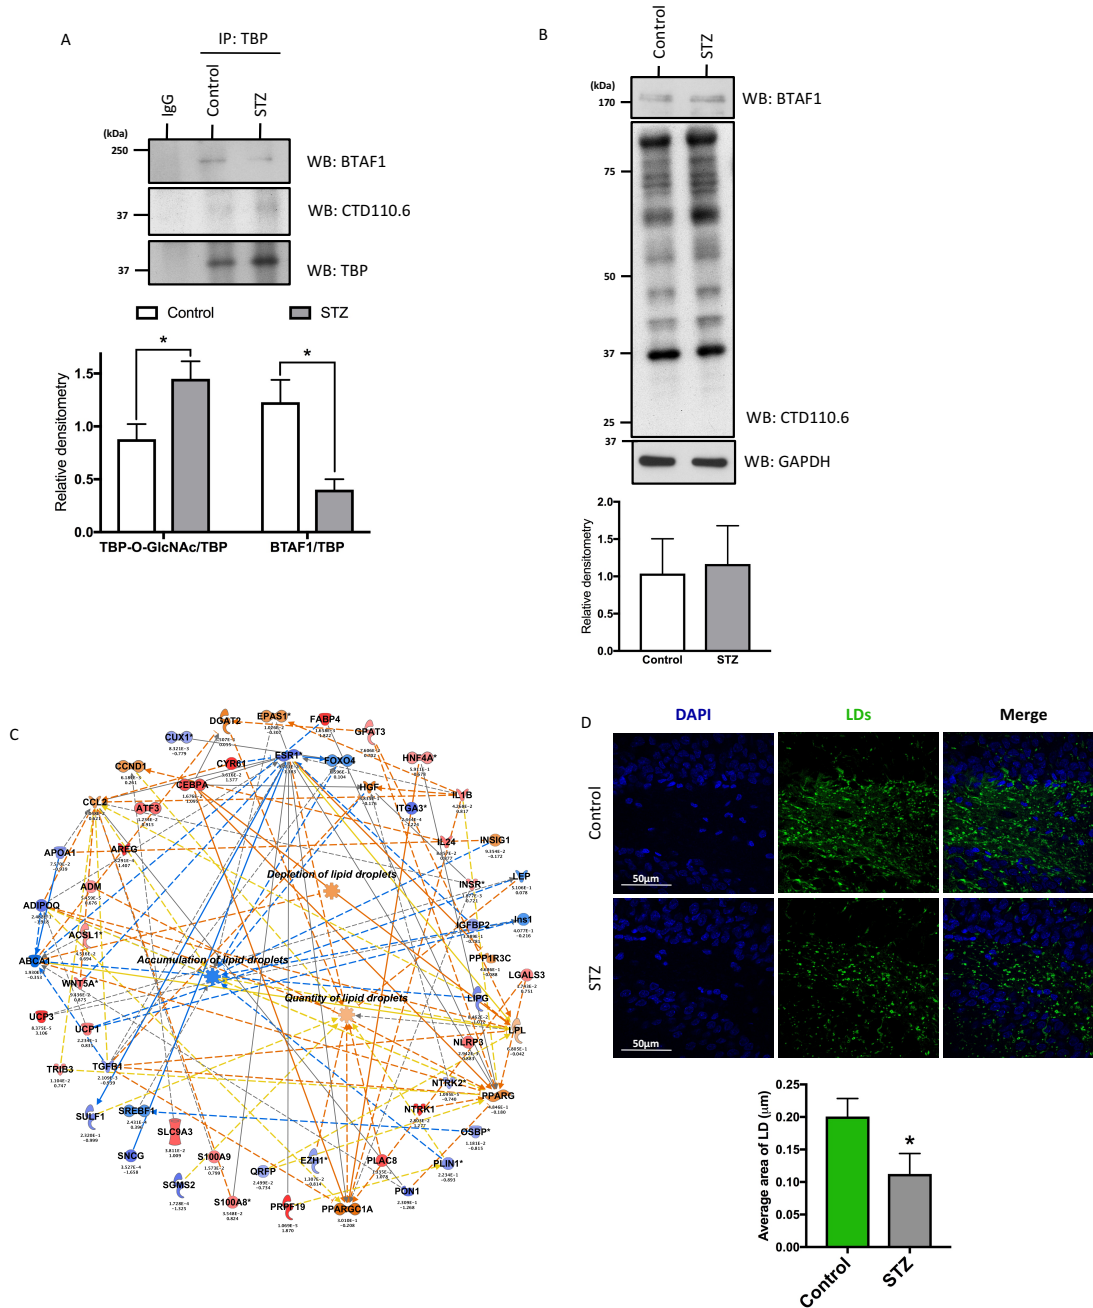

**Figure S4: Related to Figure 4**

(A) Effect of STZ-induced hyperglycemia on TBP:BTAF1 interaction in rat brain. BTAF1 was co-immunoprecipitated along with TBP by TBP antibody. Samples were immunoblotted with indicated antibodies (top panel). Densitometry analysis of TBP-O-GlcNAc and TBP:BTAF1 interaction in STZ-treated rat brain (bottom panel). Data are mean  $\pm$  SEM,  $n = 5$  rats per group, \* $p$

< 0.05. (B) Effect of STZ-induced hyperglycemia on global protein O-GlcNAcylation and BTAF1 expression in rat brain (top panel). Relative densitometry analysis of BTAF1 protein level in control and STZ injected rat (Bottom panel). Data are mean  $\pm$  SEM, n = 3 rats per group. (C) IPA representation showing upregulation prediction function pathways of accumulation, quantity and depletion of LDs. Network built using hippocampal transcriptomic data set of STZ treated rats from GSE34451 (Abdul-Rahman et al., 2012). (D) LDs staining of rat hippocampus treated with STZ or vehicle (top panel). Relative quantification of LDs in rat hippocampus (bottom panel), Data are mean  $\pm$  SEM, n = 5 rats per group, \*p < 0.05.
